# Supplementary material
Source: bioRxiv or medRxiv preprint supplement (https://medrxiv.org/highwire/filestream/98151/field_highwire_adjunct_files/1/2020.09.22.20195628-2.pdf)
Supplement: Supplementary file [file 2020.09.22.20195628-2.pdf]

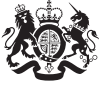

## If you have been to Wuhan, or Hubei Province, China in the last 14 days ...

Stay indoors and avoid contact with others

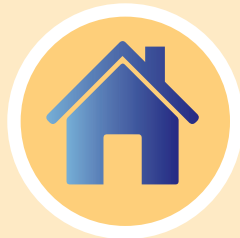

Contact NHS 111 for advice

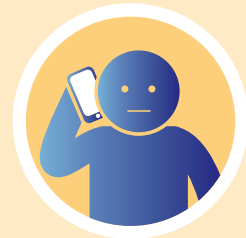

Please follow this advice even if you do not have symptoms of the virus

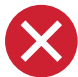

Do not go to work, school or public areas

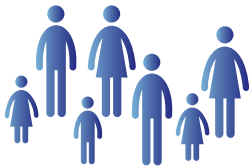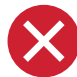

Avoid visitors in your home

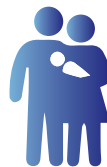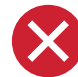

Avoid using public transport or taxis

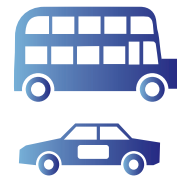

If you have been to **anywhere on mainland China** in the last 14 days and develop any of these symptoms **stay indoors and call NHS 111**

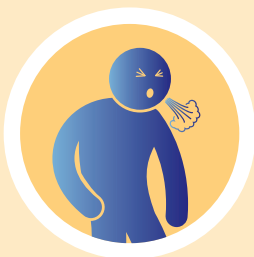

Cough

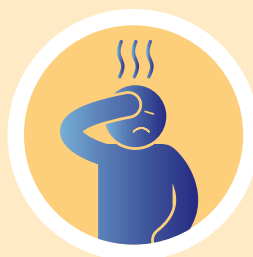

Fever

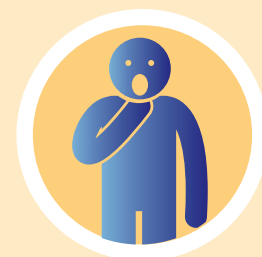

Shortness of breath
